# Supplementary material
Source: publisher figshare collection journal article supplement (https://acs.figshare.com/ndownloader/files/7424149)

## Supporting Information

# **A Phenylselenium-Substituted BODIPY Fluorescent Turn-off Probe for Fluorescence Imaging of Hydrogen Sulfide in Living Cells**

*Deyan Gong<sup>a</sup>, Xiangtao Zhu<sup>b</sup>, Yuejun Tian<sup>c</sup>, Shi-Chong Han<sup>b</sup>, Min Deng<sup>a</sup>, Anam Iqbal<sup>a</sup>, Weisheng Liu<sup>a</sup>, Wenwu Qin<sup>a\*</sup>, Huichen Guo<sup>b\*</sup>*

*<sup>a</sup>Key Laboratory of Nonferrous Metal Chemistry and Resources Utilization of Gansu Province and State Key Laboratory of Applied Organic Chemistry, College of Chemistry and Chemical Engineering, Lanzhou University, Lanzhou 730000, P. R. China*

*<sup>b</sup>State Key Laboratory of Veterinary Etiological Biology and Key Laboratory of Animal Virology of Ministry of Agriculture, Lanzhou Veterinary Research Institute, Chinese Academy of Agricultural Sciences, Xujiaping 1, Lanzhou, Gansu Province 730046, P. R. China*

*<sup>c</sup>Institute of Urology, the Second Hospital of Lanzhou University, Lanzhou, Gansu Province, P. R. China*

---

\* Corresponding author: Fax: +86-931-8912582 E-mail address: [qinww@lzu.edu.cn](mailto:qinww@lzu.edu.cn) (W. Qin); [ghch-2004@hotmail.com](mailto:ghch-2004@hotmail.com) (H. Guo)

## TABLE OF CONTENTS

1. Spectroscopic/photophysical data of **1** in addition of Na<sub>2</sub>S. (Table S1)
2. Comparison of the proposed method with other methods for H<sub>2</sub>S detection. (Table S2)
3. Photophysical Properties of **1** in the absence and in addition of Na<sub>2</sub>S in Triton X-100/DMSO/HEPES buffer (Table S3)
4. Absorption and fluorescent spectra of **1** in the absence and presence of Na<sub>2</sub>S (Figure S1)
5. Time-dependent fluorescence spectra of **1** with Na<sub>2</sub>S Triton X-100/DMSO/HEPES buffer (Figure S2)
6. Time-dependent fluorescence spectra of **1** with Na<sub>2</sub>S in DMSO/HEPES buffer (Figure S3)
7. MS Spectrum of **1** in EtOH with Na<sub>2</sub>S (Figure S4)
8. Selectivity and competition graph of **1** in the presence of biothiols with Na<sub>2</sub>S (Figure S5)
9. Fluorescence intensity of **1** in the absence and presence of Na<sub>2</sub>S as a function of pH (Figure S6)
10. The fluorescence spectral changes of the **BOD-SH** mixture solution upon addition of different concentration of benzeneselenol (Figure S7)
11. Global analysis of decay times result of **1** (Figure S8)
12. Global analysis of decay times result of **1** with Na<sub>2</sub>S (Figure S9)

13. Effects of **1** at varied concentrations on the viability of BHK cells (Figure S10)

14. NMR and MS Spectrum spectrum

**Table S1.** Spectroscopic/photophysical data of **1** (10  $\mu\text{M}$ ) in addition of  $\text{Na}_2\text{S}$ .

(Spectrum of **1**+  $\text{Na}_2\text{S}$  was recorded 20 min after  $\text{Na}_2\text{S}$  addition in Triton X-100/DMSO/HEPES buffer (0.01: 1: 9, v/v/v, 10 mM, pH 7.4) at 37  $^\circ\text{C}$ .)

| Compounds                        | Reaction time/min | $\lambda_{\text{abs}}(\text{max})/\text{nm}$ | $\lambda_{\text{ems}}(\text{max})/\text{nm}$ | $\phi$ |
|----------------------------------|-------------------|----------------------------------------------|----------------------------------------------|--------|
| <b>1</b>                         | —                 | 587                                          | 610                                          | 0.299  |
| <b>1</b> + $\text{Na}_2\text{S}$ | 20                | 516                                          | 602                                          | 0.008  |

**Table S2.** Comparison of the proposed method with other methods for  $\text{H}_2\text{S}$  detection.

| Linear range         | Detection Limit      | React time | Reference                                 |
|----------------------|----------------------|------------|-------------------------------------------|
| 0-100 $\mu\text{M}$  | 2.46 $\mu\text{M}$   | 40min      | Anal.Chem., 2016, 88, 5476–5481           |
| 0-15 $\mu\text{M}$   | 0.05 $\mu\text{M}$   | 10min      | Chem. Commun., 2012, 48, 10529–10531.     |
| 0-8 $\mu\text{M}$    | 0.007 $\mu\text{M}$  | 140 s      | J. Am. Chem. Soc., 2015, 137, 8490–8498   |
| 0-10 $\mu\text{M}$   | 0.01 $\mu\text{M}$   | 15min      | Chem. Commun., 2013, 49, 403–405.         |
| 0-300 $\mu\text{M}$  | 0.0682 $\mu\text{M}$ | 2min       | Chem. Commun., 2015, 51, 16225-16228      |
| 0-125 $\mu\text{M}$  | 0.38 $\mu\text{M}$   | 30min      | Chem. Commun., 2015, 51, 10463-10466.     |
| 0-16 $\mu\text{M}$   | 0.086 $\mu\text{M}$  | 90min      | J. Am. Chem. Soc., 2015, 137, 10216–10223 |
| 1.0-30 $\mu\text{M}$ | 0.052 $\mu\text{M}$  | 60min      | Anal. Chem., 2016, 88, 1434–1439.         |
| 0-30 $\mu\text{M}$   | 0.85 $\mu\text{M}$   | 20min      | Anal. Chem., 2015, 87, 2678–2684          |
| 0-15 $\mu\text{M}$   | 0.0025 $\mu\text{M}$ | 20min      | this work                                 |

**Table S3.** Photophysical Properties of **1** (10  $\mu\text{M}$ ) in the absence and in addition of  $\text{Na}_2\text{S}$  in Triton X-100/DMSO/HEPES buffer (0.01: 1: 9, v/v/v, 10 mM, pH 7.4) at 37

°C. Global analyses of decay times  $\tau_1$ ,  $\tau_2$  and  $\tau_3$ , and the relative amplitude  $\alpha_i$  (%), each spectrum was recorded 20 min after Na<sub>2</sub>S addition at the same excitation wavelength (560 nm), but at different emission wavelength (590, 610, 630 and 650 nm).

| Addition of Na <sub>2</sub> S / $\mu$ M | Monitored wavelength/ nm | $\tau_1$ /ns    | $\tau_2$ /ns    | $\tau_3$ /ns    | $\alpha_1$ (%) | $\alpha_2$ (%) | $\alpha_3$ (%) |
|-----------------------------------------|--------------------------|-----------------|-----------------|-----------------|----------------|----------------|----------------|
| <b>0</b>                                | 590                      |                 |                 |                 | 1%             | 99%            | -              |
|                                         | 610                      | 2.73 $\pm$ 0.01 | 1.04 $\pm$ 0.01 | -               | 4%             | 96%            | -              |
|                                         | 630                      |                 |                 |                 | 5%             | 95%            | -              |
|                                         | 650                      |                 |                 |                 | 5%             | 95%            | -              |
| <b>10</b>                               | 590                      |                 |                 |                 | 22%            | 45%            | 33%            |
|                                         | 610                      | 3.26 $\pm$ 0.01 | 1.31 $\pm$ 0.01 | 0.49 $\pm$ 0.03 | 26%            | 54%            | 20%            |
|                                         | 630                      |                 |                 |                 | 31%            | 51%            | 18%            |
|                                         | 650                      |                 |                 |                 | 35%            | 44%            | 21%            |
| <b>25</b>                               | 590                      |                 |                 |                 | 27%            | 40%            | 33%            |
|                                         | 610                      | 3.34 $\pm$ 0.01 | 1.47 $\pm$ 0.01 | 0.48 $\pm$ 0.02 | 28%            | 47%            | 25%            |
|                                         | 630                      |                 |                 |                 | 30%            | 47%            | 23%            |
|                                         | 650                      |                 |                 |                 | 31%            | 45%            | 24%            |
| <b>100</b>                              | 590                      |                 |                 |                 | 42%            | 42%            | 16%            |
|                                         | 610                      | 2.99 $\pm$ 0.01 | 1.28 $\pm$ 0.01 | 0.44 $\pm$ 0.06 | 40%            | 43%            | 17%            |
|                                         | 630                      |                 |                 |                 | 42%            | 43%            | 15%            |
|                                         | 650                      |                 |                 |                 | 42%            | 47%            | 11%            |

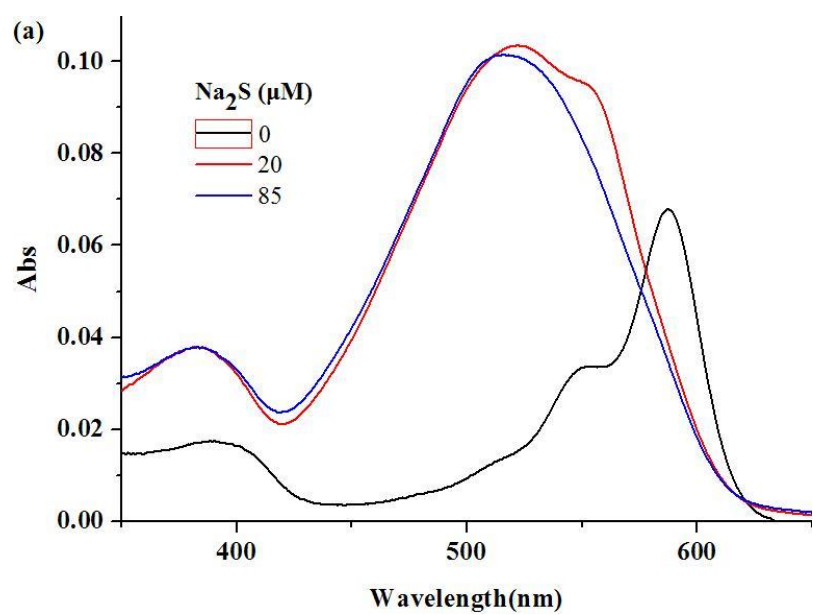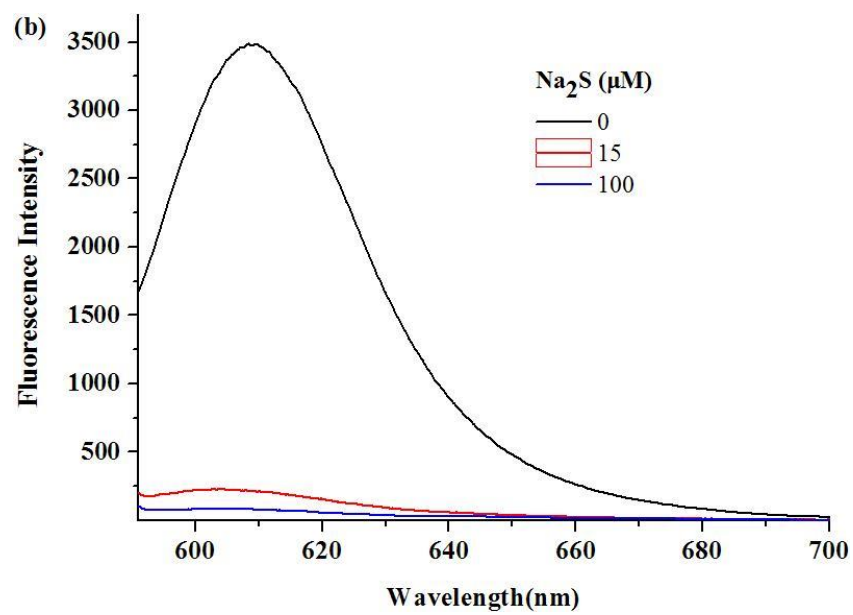

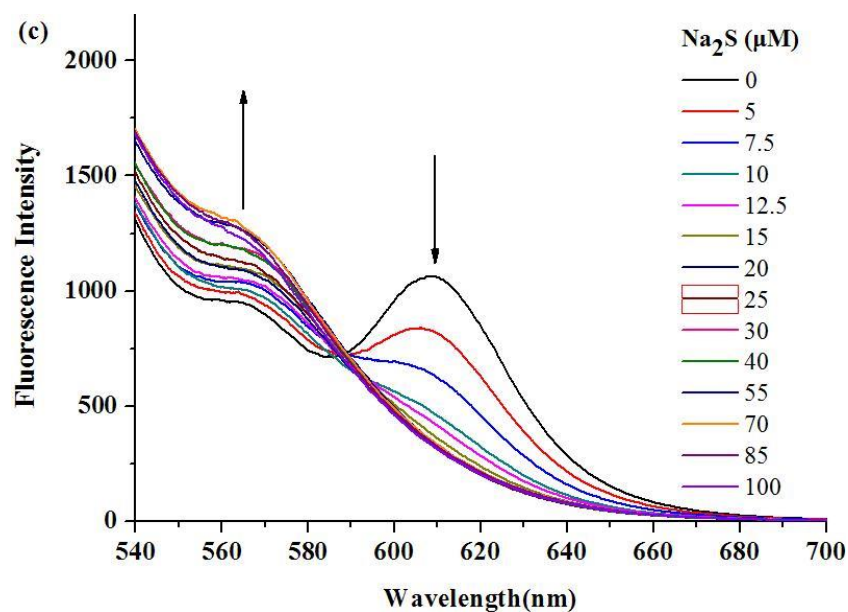

**Figure S1.** (a) Absorption and (b) fluorescent spectra of **1** (10  $\mu\text{M}$ ) in the absence and presence of different concentration of  $\text{Na}_2\text{S}$ . Each data point was acquired 20 min after addition in Triton X-100/DMSO/HEPES buffer (0.01: 1: 9, v/v/v, 10 mM, pH 7.4) at 37  $^{\circ}\text{C}$ .  $\lambda_{\text{ex}} = 582$  nm. (c) fluorescence spectral changes of **1** (10  $\mu\text{M}$ ) upon addition of  $\text{Na}_2\text{S}$ . Each spectrum was recorded 20 min after  $\text{Na}_2\text{S}$  addition.  $\lambda_{\text{ex}} = 500$  nm.

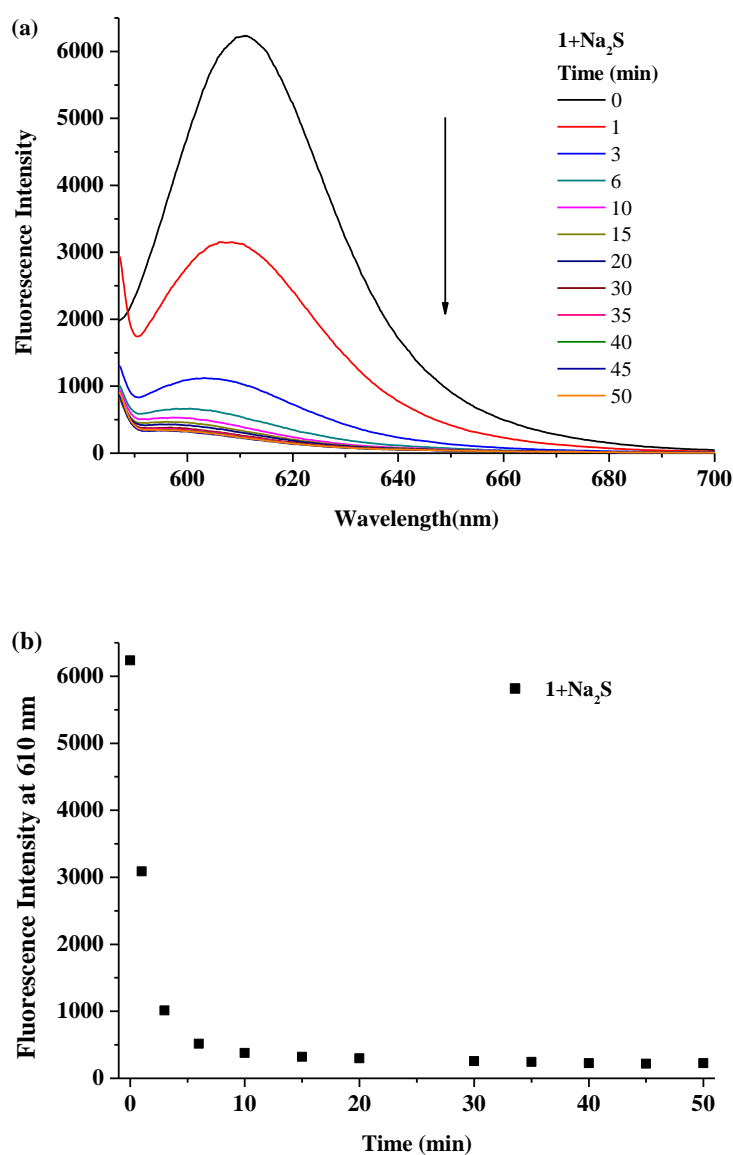

**Figure S2.** (a) Time-dependent fluorescence spectra of **1** (10  $\mu\text{M}$ ) with 10 equiv. of  $\text{Na}_2\text{S}$  in Triton X-100/DMSO/HEPES buffer (0.01: 1: 9, v/v/v, 10 mM, pH 7.4) at 37  $^\circ\text{C}$ . (b) is time course of the response at 610 nm of (a),  $\lambda_{\text{ex}} = 582 \text{ nm}$ .

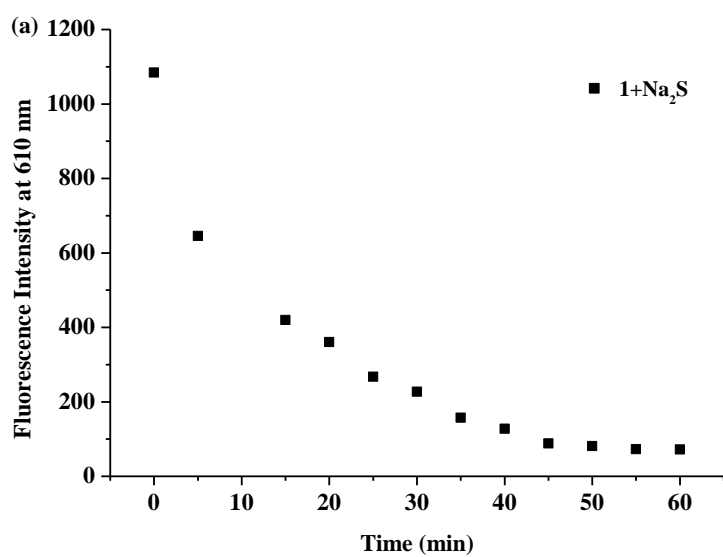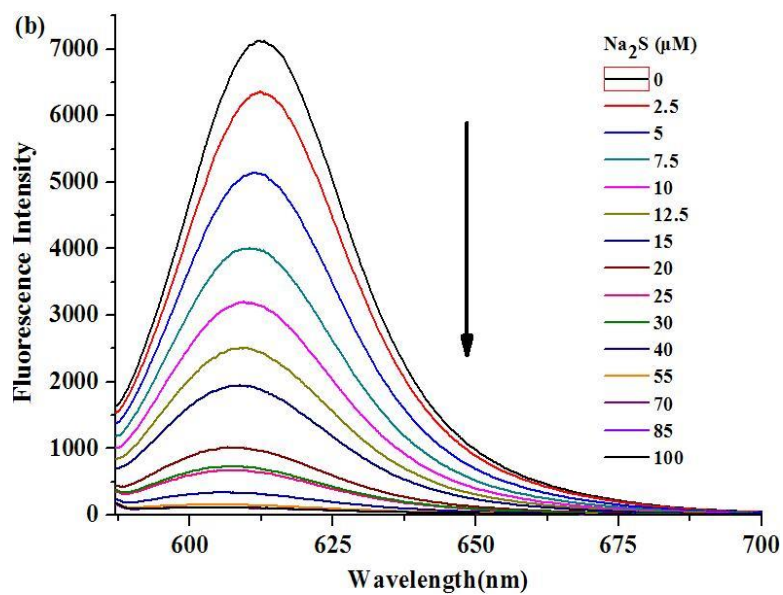



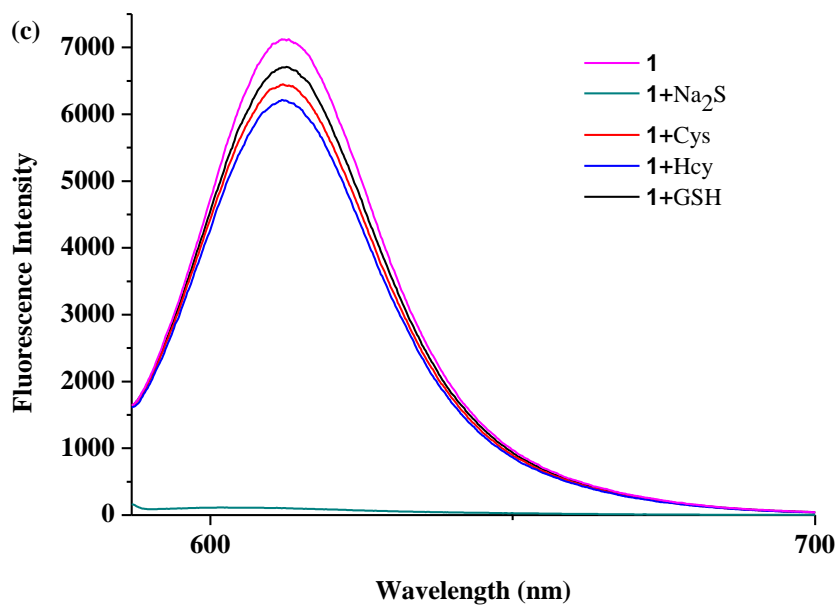

**Figure S3.** (a) Time course of the response at 610 nm of time-dependent fluorescence spectra of **1** (10  $\mu\text{M}$ ) with 10 equiv. of  $\text{Na}_2\text{S}$ . (b) Fluorescence spectral changes of **1** (10  $\mu\text{M}$ ) upon addition of  $\text{Na}_2\text{S}$ . (c) Emission response of **1** (10  $\mu\text{M}$ ) upon addition of 10 equiv. of biothiols and  $\text{Na}_2\text{S}$ . Each spectrum was recorded 50 min after  $\text{Na}_2\text{S}$  addition in DMSO/HEPES buffer (1: 1, v/v, 10 mM, pH 7.4) at 37  $^\circ\text{C}$ ,  $\lambda_{\text{ex}} = 582 \text{ nm}$ .)

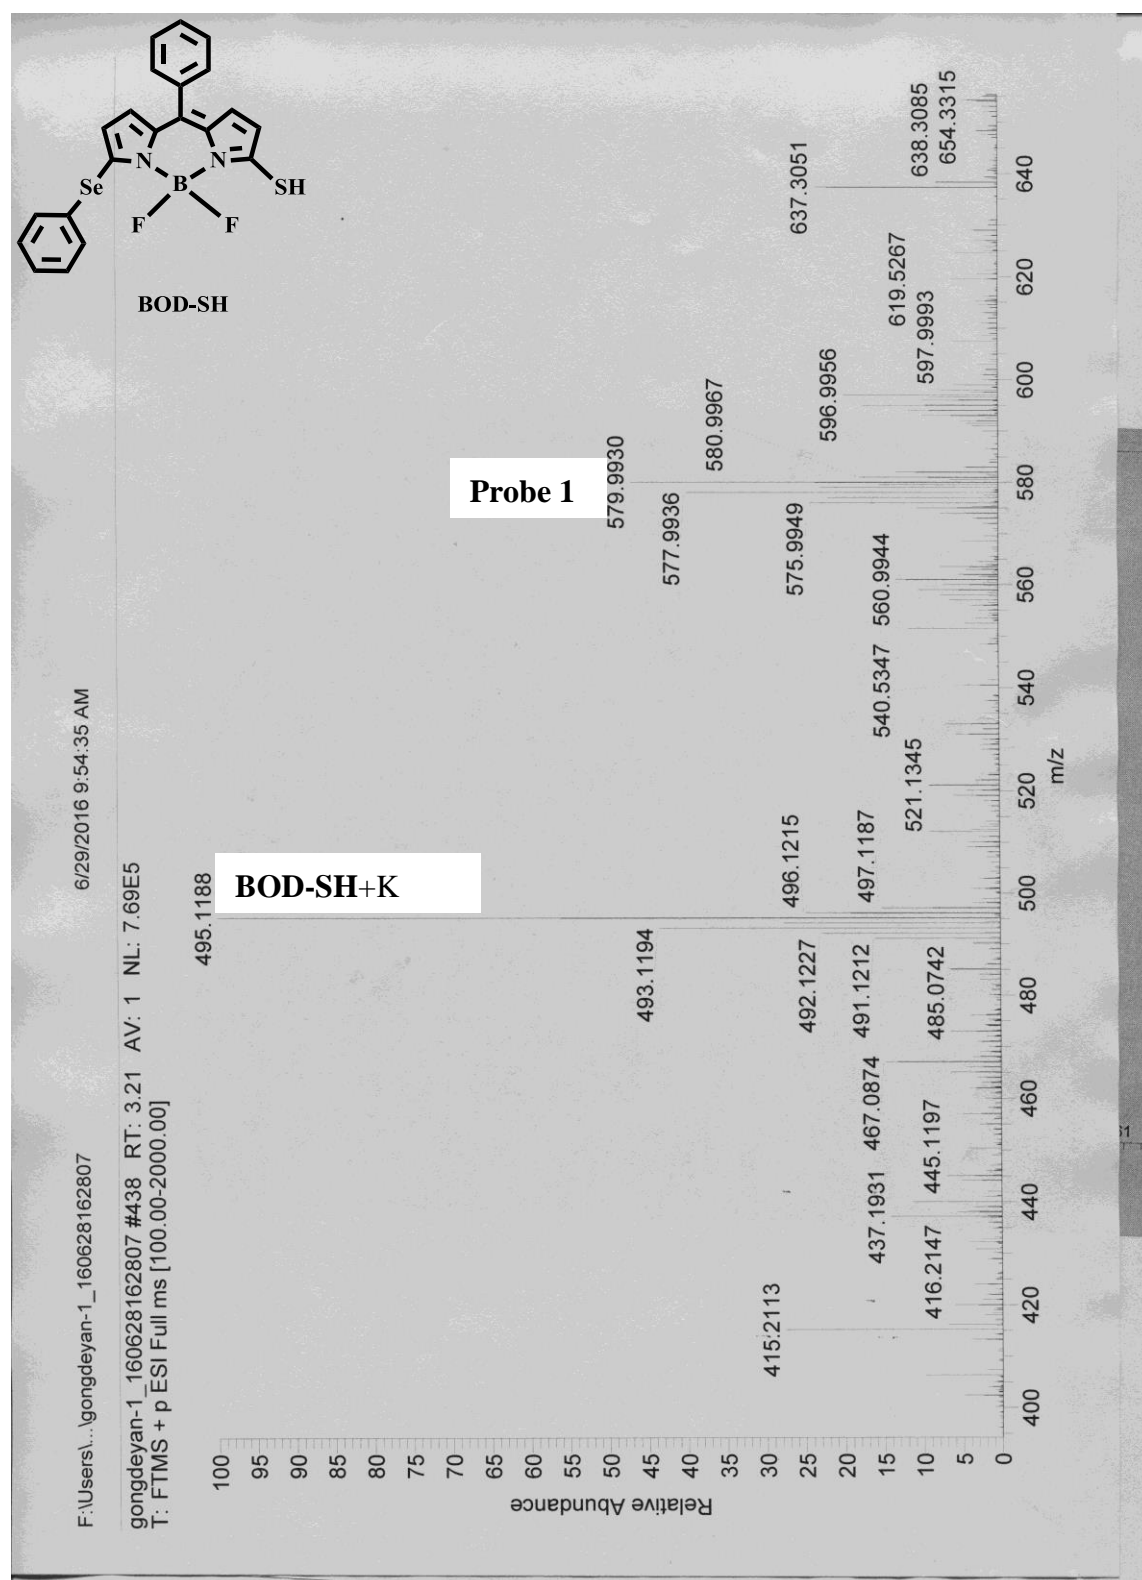

**Figure S4.** MS Spectrum of **1** in EtOH with Na<sub>2</sub>S (1 equiv.) at 2 h reaction time at 25 °C. The predicted product is **BOD-SH** (the molecular weight of [**BOD-SH**] (C<sub>21</sub>H<sub>15</sub>BF<sub>2</sub>N<sub>2</sub>SSe) is 456.0). The peaks at m/z 495.1 (calcd = 495.0) corresponding to [**BOD-SH**+K].

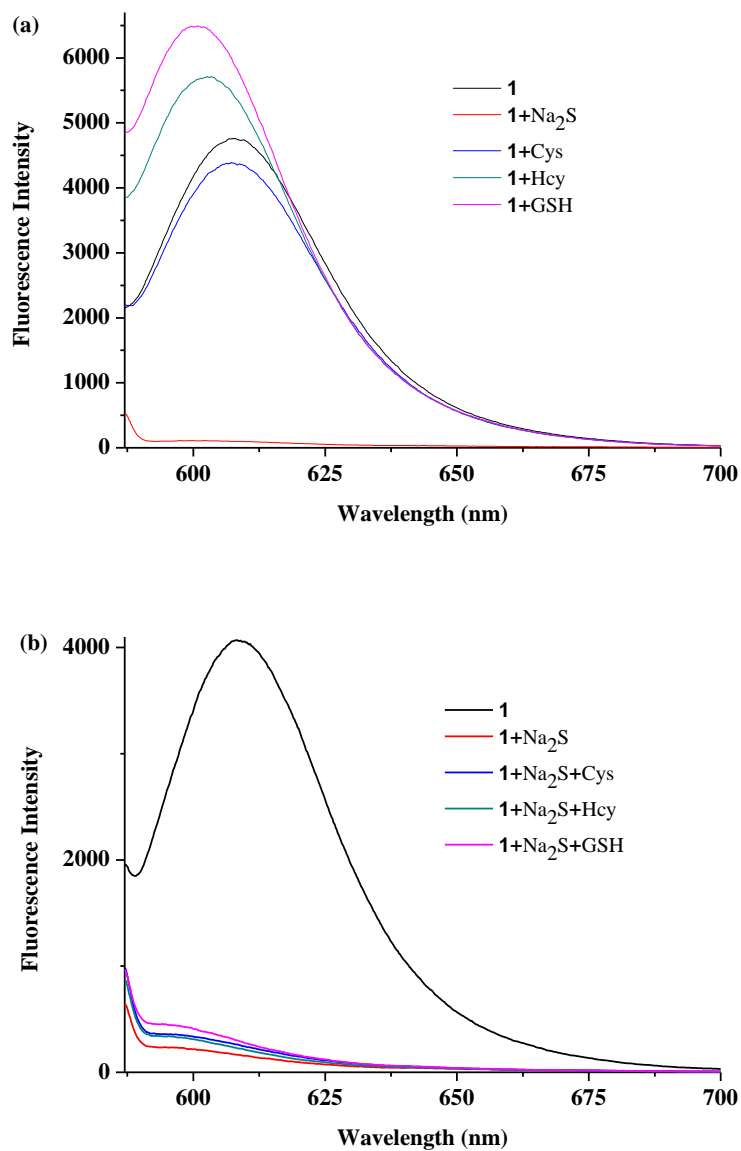

**Figure S5.** (a) Emission response of **1** (10  $\mu$ M) upon addition of 10 equiv. of biothiols and Na<sub>2</sub>S. (b) the competition graph of **1** (10  $\mu$ M) in the presence of 10 equiv. of biothiols with Na<sub>2</sub>S. Each data point was acquired 50 min after addition at 37 °C.  $\lambda_{\text{ex}}$  = 582 nm.

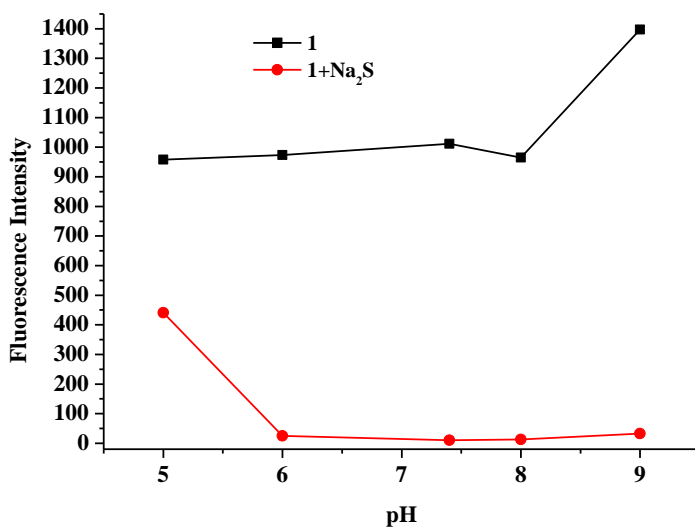

**Figure S6.** Fluorescence intensity of **1** at 610 nm in the absence and presence of 10 equiv. of Na<sub>2</sub>S as a function of pH. **1** = 10  $\mu$ M,  $\lambda_{\text{ex}}$  = 582 nm. Each data point was acquired 50 min after addition of Na<sub>2</sub>S in Triton X-100/DMSO/HEPES buffer (0.01: 1: 9, v/v/v, 10 mM, pH 7.4) at 37 °C.

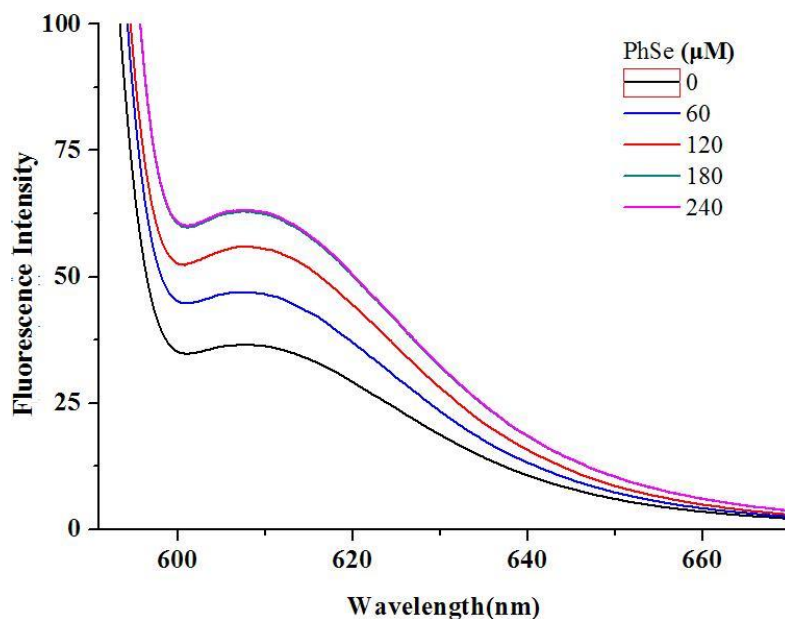

**Figure S7.** The fluorescence spectral changes of the **BOD-SH** mixture solution upon addition of different concentration of benzeneselenol. Each data point was acquired 20 min after addition of benzeneselenol in Triton X-100/DMSO/HEPES buffer (0.01: 1: 9, v/v/v, 10 mM, pH 7.4) at 37 °C,  $\lambda_{\text{ex}}$  = 582 nm.

- ◆ 2PHSE-EX560EM610-DMSO-add irf.FL
- ◆ 2PHSE-EX560EM630-DMSO-add irf.FL
- ◆ 2PHSE-EX560EM650-DMSO-add irf.FL
- ◆ 2PHSE-EX560EM590-DMSO-add irf.FL

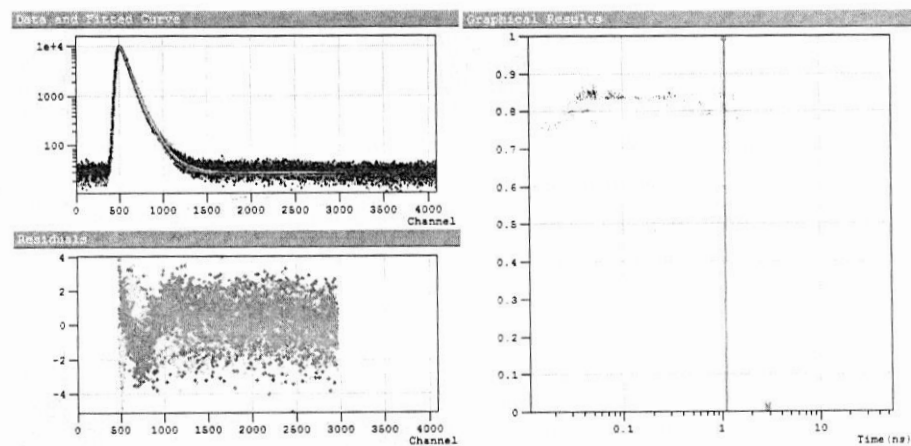

File: 2PHSE-EX560EM610-DMSO-add irf.FL

❖ Global Analysis (Reconvolution)

Fitting range : [475; 2950] channels  
Global  $\chi^2$  : 1.314  
 $\chi^2$  : 1.100

|   | $B_i$  | $\Delta B_i$ | $f_i$ (%) | $\Delta f_i$ (%) | $\tau_i$ (ns) | $\Delta \tau_i$ (ns) |
|---|--------|--------------|-----------|------------------|---------------|----------------------|
| 1 | 0.0282 | 4.2e-5       | 96.28     | 0.2803           | 1.037 linked  | 0.0013               |
| 2 | 0.0004 | 2.7e-5       | 3.7242    | 0.2645           | 2.733 linked  | 0.0072               |

Shift : 0.0026 ns ( $\pm$  0 ns)  
Decay : 27.27 ( $\pm$  0)  
Background : 12.40  
IRF Background : 12.40

File: 2PHSE-EX560EM630-DMSO-add irf.FL

❖ Global Analysis (Reconvolution)

Fitting range : [475; 2950] channels  
Global  $\chi^2$  : 1.314  
 $\chi^2$  : 1.454

|   | $B_i$  | $\Delta B_i$ | $f_i$ (%) | $\Delta f_i$ (%) | $\tau_i$ (ns) | $\Delta \tau_i$ (ns) |
|---|--------|--------------|-----------|------------------|---------------|----------------------|
| 1 | 0.0281 | 5.5e-5       | 94.85     | 0.3920           | 1.037 linked  | 0.0015               |
| 2 | 0.0006 | 3.9e-5       | 5.1468    | 0.4331           | 2.733 linked  | 0.0082               |

Shift : 0.0074 ns ( $\pm$  0 ns)  
Decay : 23.17 ( $\pm$  0)  
Background : 12.40  
IRF Background : 12.40

File: 2PHSE-EX560EM650-DMSO-add irf.FL

❖ Global Analysis (Reconvolution)

Fitting range : [475; 2950] channels

Global  $\chi^2$  : 1.314

$\chi^2$  : 1.243

|   | $B_i$  | $\Delta B_i$ | $f_i$ (%) | $\Delta f_i$ (%) | $\tau_i$ (ns) | $\Delta \tau_i$ (ns) |
|---|--------|--------------|-----------|------------------|---------------|----------------------|
| 1 | 0.0282 | 5.3e-5       | 94.56     | 0.3410           | 1.037 linked  | 0.0014               |
| 2 | 0.0006 | 3.8e-5       | 5.4400    | 0.3890           | 2.733 linked  | 0.0076               |

Shift : 0.0082 ns ( $\pm$  0 ns)

Decay : 26.88 ( $\pm$  0 )

Background : 12.40

File: 2PHSE-EX560EM590-DMSO-add irf.FL

❖ Global Analysis (Reconvolution)

Fitting range : [475; 2950] channels

Global  $\chi^2$  : 1.314

$\chi^2$  : 1.458

|   | $B_i$  | $\Delta B_i$ | $f_i$ (%) | $\Delta f_i$ (%) | $\tau_i$ (ns) | $\Delta \tau_i$ (ns) |
|---|--------|--------------|-----------|------------------|---------------|----------------------|
| 1 | 0.0280 | 4.6e-5       | 98.88     | 0.3729           | 1.037 linked  | 0.0015               |
| 2 | 0.0001 | 1.8e-5       | 1.1161    | 0.2079           | 2.733 linked  | 0.0082               |

Shift : -0.0131 ns ( $\pm$  0 ns)

Decay : 27.72 ( $\pm$  0 )

Background : 12.40

**Figure S8.** Global analysis of decay times result of **1** (10  $\mu$ M) in Triton X-100/DMSO/HEPES buffer (0.01: 1: 9, v/v/v, 10 mM, pH 7.4) at 37 °C, each spectrum was recorded at the same excitation wavelength (560 nm), but at different emission wavelength (590, 610, 630 and 650 nm).

- ◆ 2PHSE-EX560EM610-DMSO-13-25-add irf.FL
- ◆ 2PHSE-EX560EM630-DMSO-13-25-add irf.FL
- ◆ 2PHSE-EX560EM650-DMSO-13-25-add irf.FL
- ◆ 2PHSE-EX560EM590-DMSO-13-25-add irf.FL

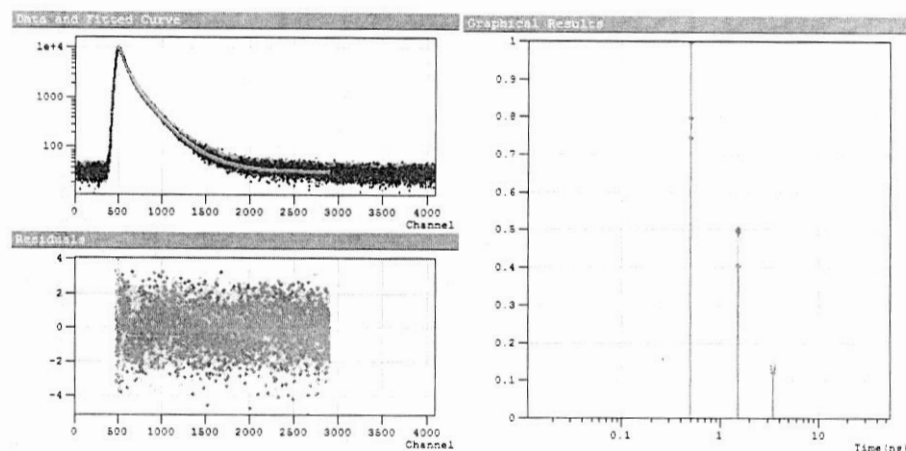

File: 2PHSE-EX560EM610-DMSO-13-25-add irf.FL

#### ◆ Global Analysis (Reconvolution)

Fitting range : [475; 2890] channels  
Global  $\chi^2$  : 1.109  
 $\chi^2$  : 1.057

|   | $B_i$  | $\Delta B_i$ | $f_i$ (%) | $\Delta f_i$ (%) | $\tau_i$ (ns) | $\Delta \tau_i$ (ns) |
|---|--------|--------------|-----------|------------------|---------------|----------------------|
| 1 | 0.0177 | 0.0002       | 24.90     | 1.6047           | 0.483 linked  | 0.0246               |
| 2 | 0.0109 | 0.0001       | 47.00     | 0.9672           | 1.473 linked  | 0.0098               |
| 3 | 0.0029 | 10.0e-5      | 28.10     | 1.0211           | 3.339 linked  | 0.0025               |

Shift : -0.1332 ns ( $\pm 0$  ns)  
Decay : 29.74 ( $\pm 0$ )  
Background : 12.40  
IRF Background : 12.40

File: 2PHSE-EX560EM630-DMSO-13-25-add irf.FL

#### ◆ Global Analysis (Reconvolution)

Fitting range : [475; 2890] channels  
Global  $\chi^2$  : 1.109  
 $\chi^2$  : 1.087

|   | $B_i$  | $\Delta B_i$ | $f_i$ (%) | $\Delta f_i$ (%) | $\tau_i$ (ns) | $\Delta \tau_i$ (ns) |
|---|--------|--------------|-----------|------------------|---------------|----------------------|
| 1 | 0.0165 | 0.0002       | 23.07     | 1.5532           | 0.483 linked  | 0.0250               |
| 2 | 0.0111 | 0.0001       | 47.45     | 0.9732           | 1.473 linked  | 0.0099               |
| 3 | 0.0031 | 0.0001       | 29.48     | 1.0904           | 3.339 linked  | 0.0026               |

Shift : -0.1182 ns ( $\pm 0$  ns)  
Decay : 29.74 ( $\pm 0$ )

Background : 31.40 ( $\pm 0$ )  
 IRF Background : 12.40

File: 2PHSE-EX560EM650-DMSO-13-25-add irf.FL

❖ Global Analysis (Reconvolution)

Fitting range : [475; 2890] channels  
 Global  $\chi^2$  : 1.109  
 $\chi^2$  : 1.150

|   | $B_i$  | $\Delta B_i$ | $f_i$ (%) | $\Delta f_i$ (%) | $\tau_i$ (ns) | $\Delta \tau_i$ (ns) |
|---|--------|--------------|-----------|------------------|---------------|----------------------|
| 1 | 0.0173 | 0.0002       | 24.32     | 1.6864           | 0.483 linked  | 0.0257               |
| 2 | 0.0105 | 0.0001       | 45.15     | 0.9962           | 1.473 linked  | 0.0102               |
| 3 | 0.0031 | 0.0001       | 30.54     | 1.1556           | 3.339 linked  | 0.0027               |

Shift : -0.1041 ns ( $\pm 0$  ns)  
 Decay : 32.28 ( $\pm 0$ )  
 Background : 32.28 ( $\pm 0$ )  
 IRF Background : 12.40

File: 2PHSE-EX560EM590-DMSO-13-25-add irf.FL

❖ Global Analysis (Reconvolution)

Fitting range : [475; 2890] channels  
 Global  $\chi^2$  : 1.109  
 $\chi^2$  : 1.143

|   | $B_i$  | $\Delta B_i$ | $f_i$ (%) | $\Delta f_i$ (%) | $\tau_i$ (ns) | $\Delta \tau_i$ (ns) |
|---|--------|--------------|-----------|------------------|---------------|----------------------|
| 1 | 0.0222 | 0.0002       | 32.78     | 2.1117           | 0.483 linked  | 0.0256               |
| 2 | 0.0090 | 0.0002       | 40.38     | 1.0272           | 1.473 linked  | 0.0102               |
| 3 | 0.0026 | 8.9e-5       | 26.85     | 0.9948           | 3.339 linked  | 0.0026               |

Shift : -0.0598 ns ( $\pm 0$  ns)  
 Decay : 29.11 ( $\pm 0$ )  
 Background : 29.11 ( $\pm 0$ )  
 IRF Background : 12.40

**Figure S9.** Global analysis of decay times result of **1** (10  $\mu$ M) in addition of 25  $\mu$ M Na<sub>2</sub>S in Triton X-100/DMSO/HEPES buffer (0.01: 1: 9, v/v/v, 10 mM, pH 7.4) at 37 °C, each spectrum was recorded 20 min after Na<sub>2</sub>S addition at the same excitation wavelength (560 nm), but at different emission wavelength (590, 610, 630 and 650 nm).



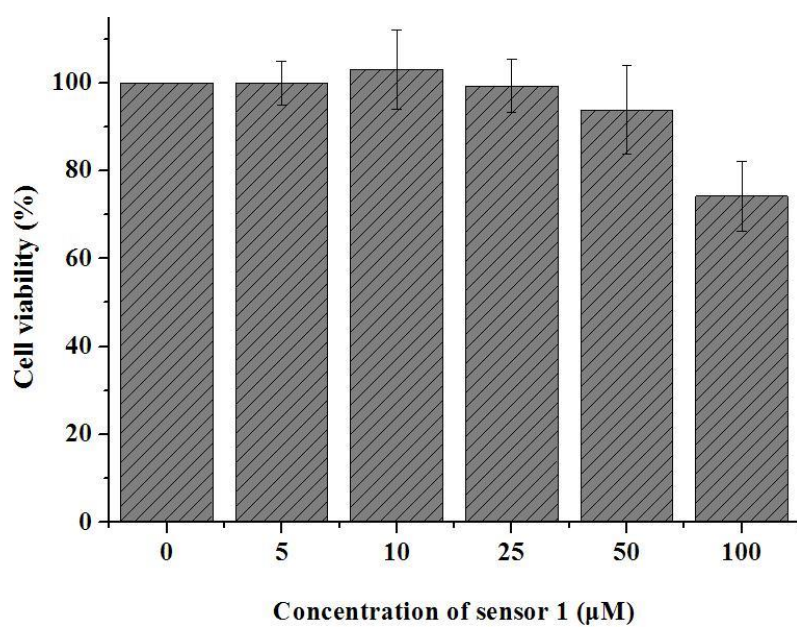

**Figure S10.** Effects of **1** at varied concentrations on the viability of BHK cells. The cell viability data were checked three times.

**$^1\text{H}$  NMR ( $\text{CDCl}_3$ , 400 MHz) spectrum of 2**

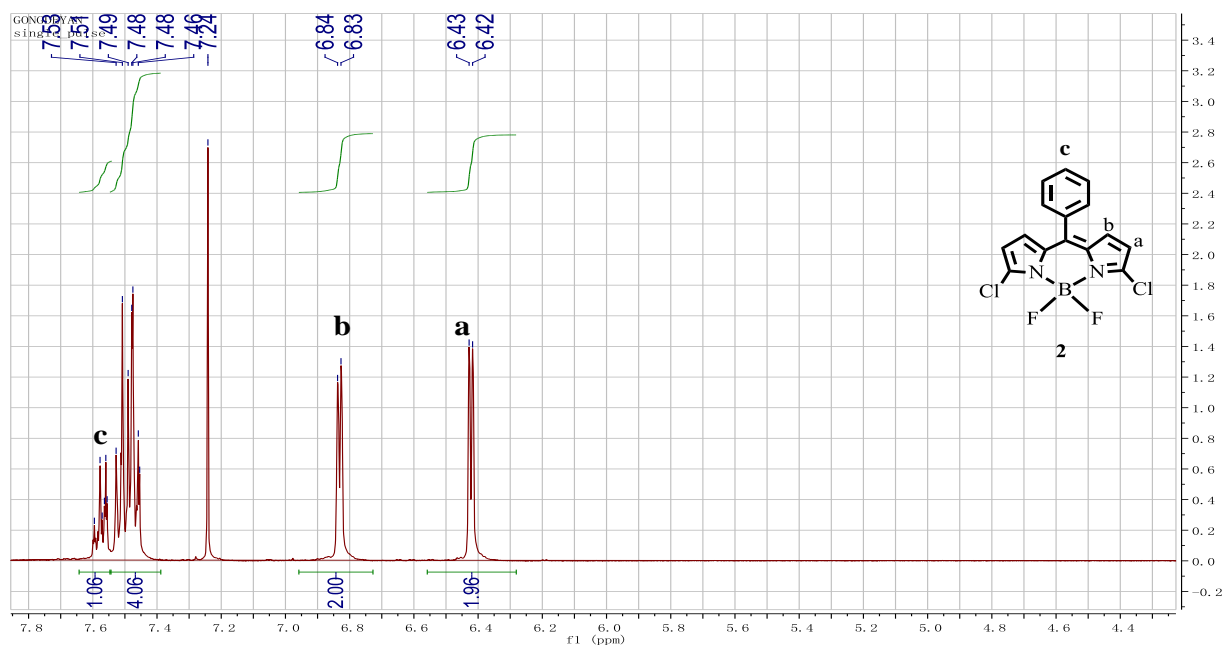

**$^1\text{H}$  NMR ( $\text{CDCl}_3$ , 400 MHz) spectrum of 1**

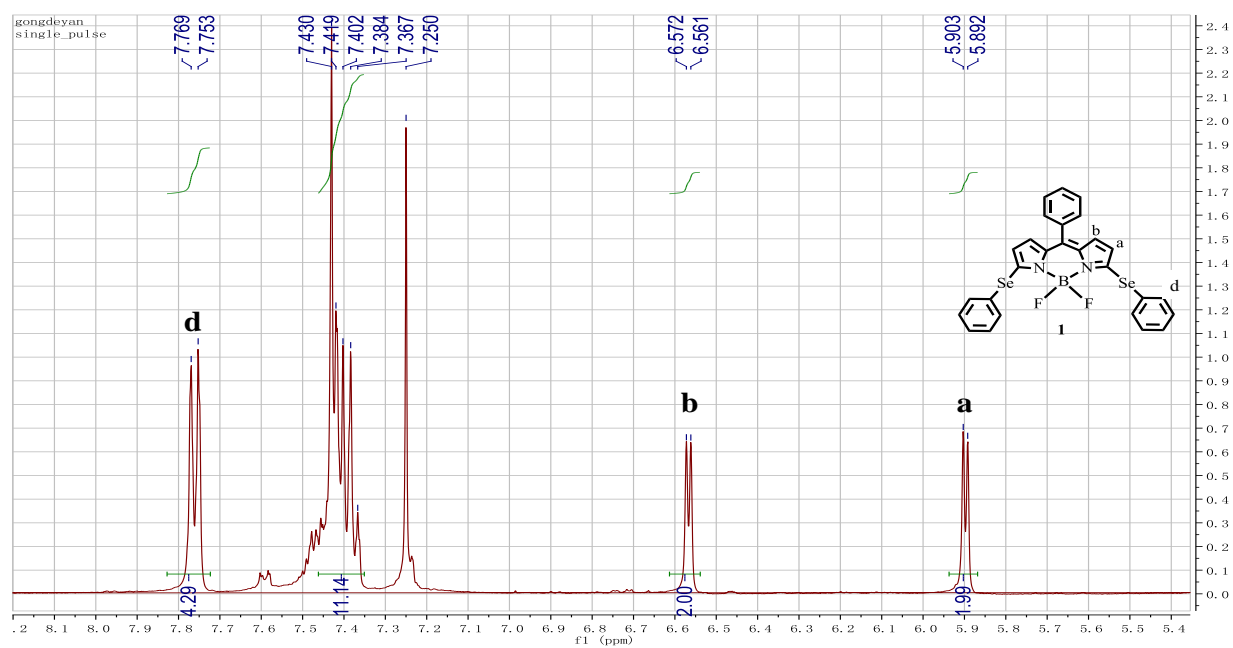

**$^{13}\text{C}$  NMR (CDCl<sub>3</sub>, 400/4 MHz) spectrum of **1****

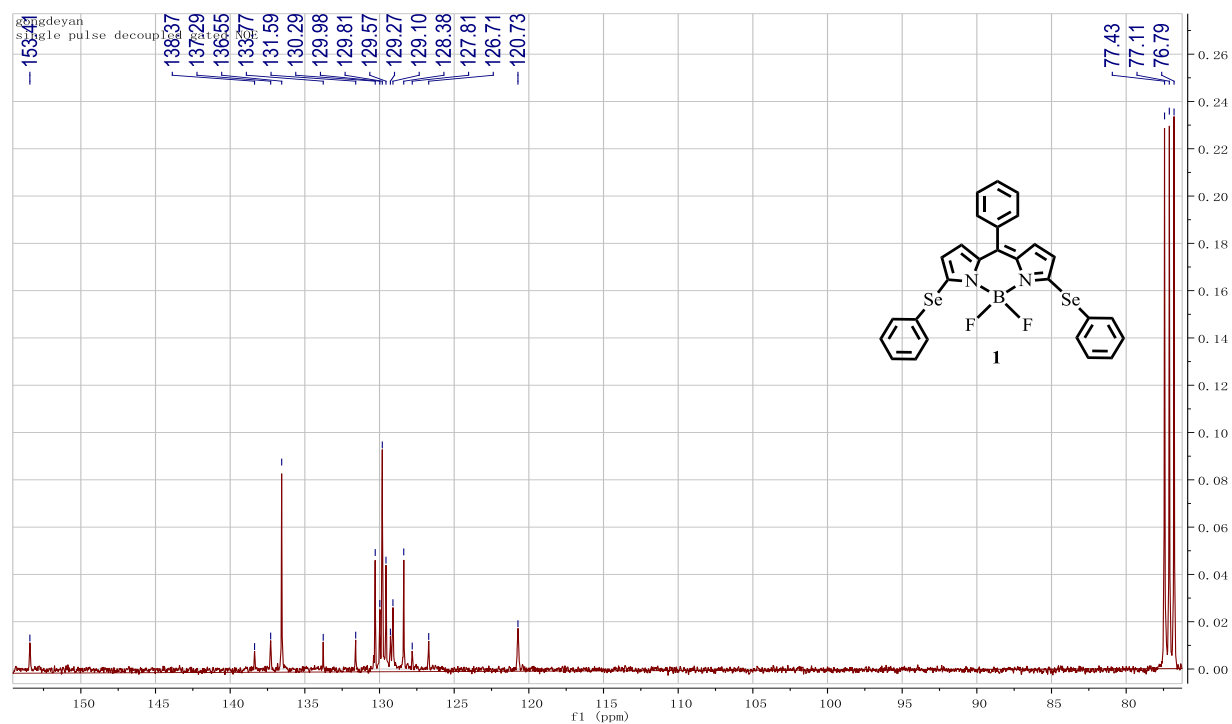

MS Spectrum of **2** (C<sub>15</sub>H<sub>9</sub>BCl<sub>2</sub>F<sub>2</sub>N<sub>2</sub>, the molecular weight of **2** is 336.9).

### Generic Display Report

#### Analysis Info

Analysis Name D:\Data\yangy\new\GONGDEYAN150305\_4\_01\_1476.d  
Method POS\_100-1200\_For LC.m  
Sample Name GONGDEYAN150305  
Comment

Acquisition Date 3/5/2015 10:49:18 AM

Operator LZU  
Instrument micrOTOF

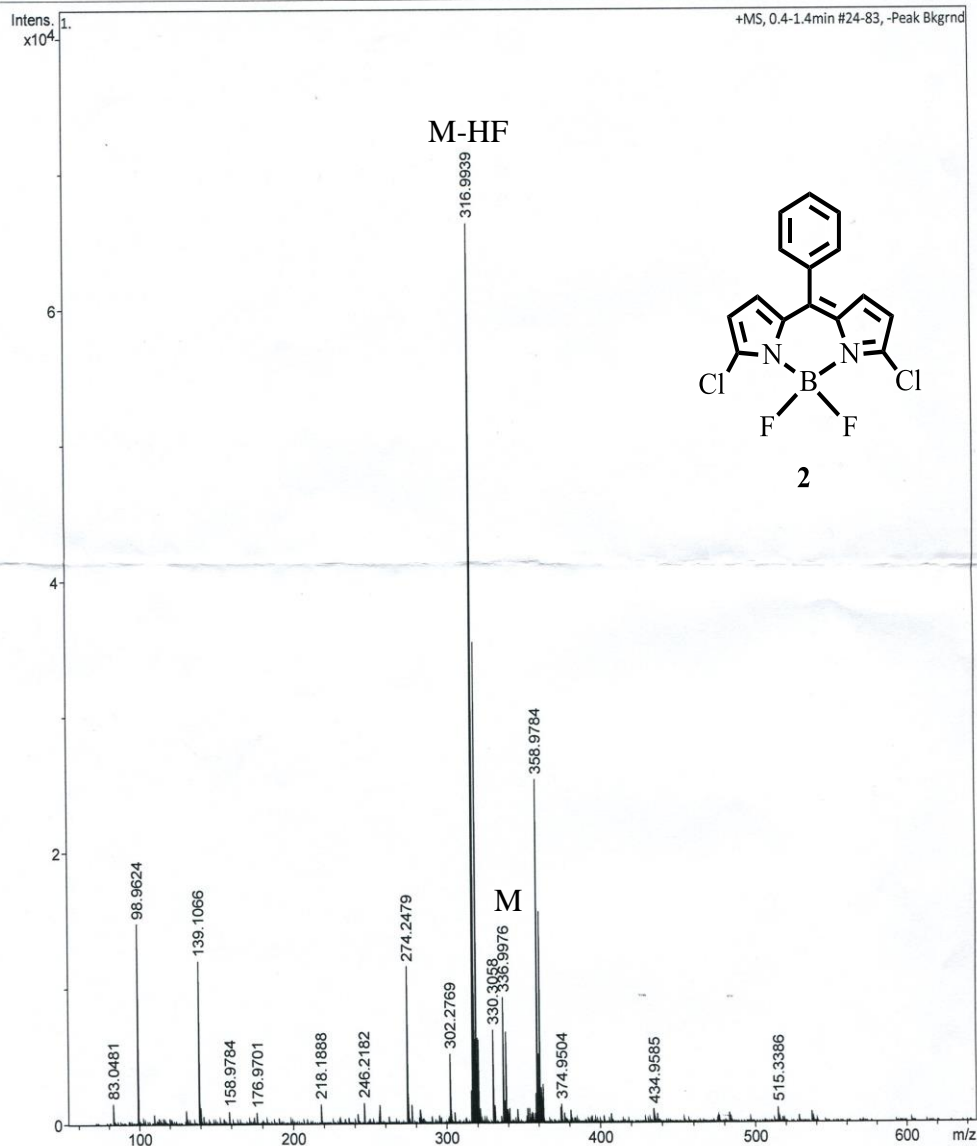

printed: 3/5/2015 11:05:41 AM

by: LZU

Page 1 of 1

HRMS Spectrum of **1** (the molecular weight of [**1**] ( $C_{17}H_{13}BClF_2N_4O$ ) is 579.9940).

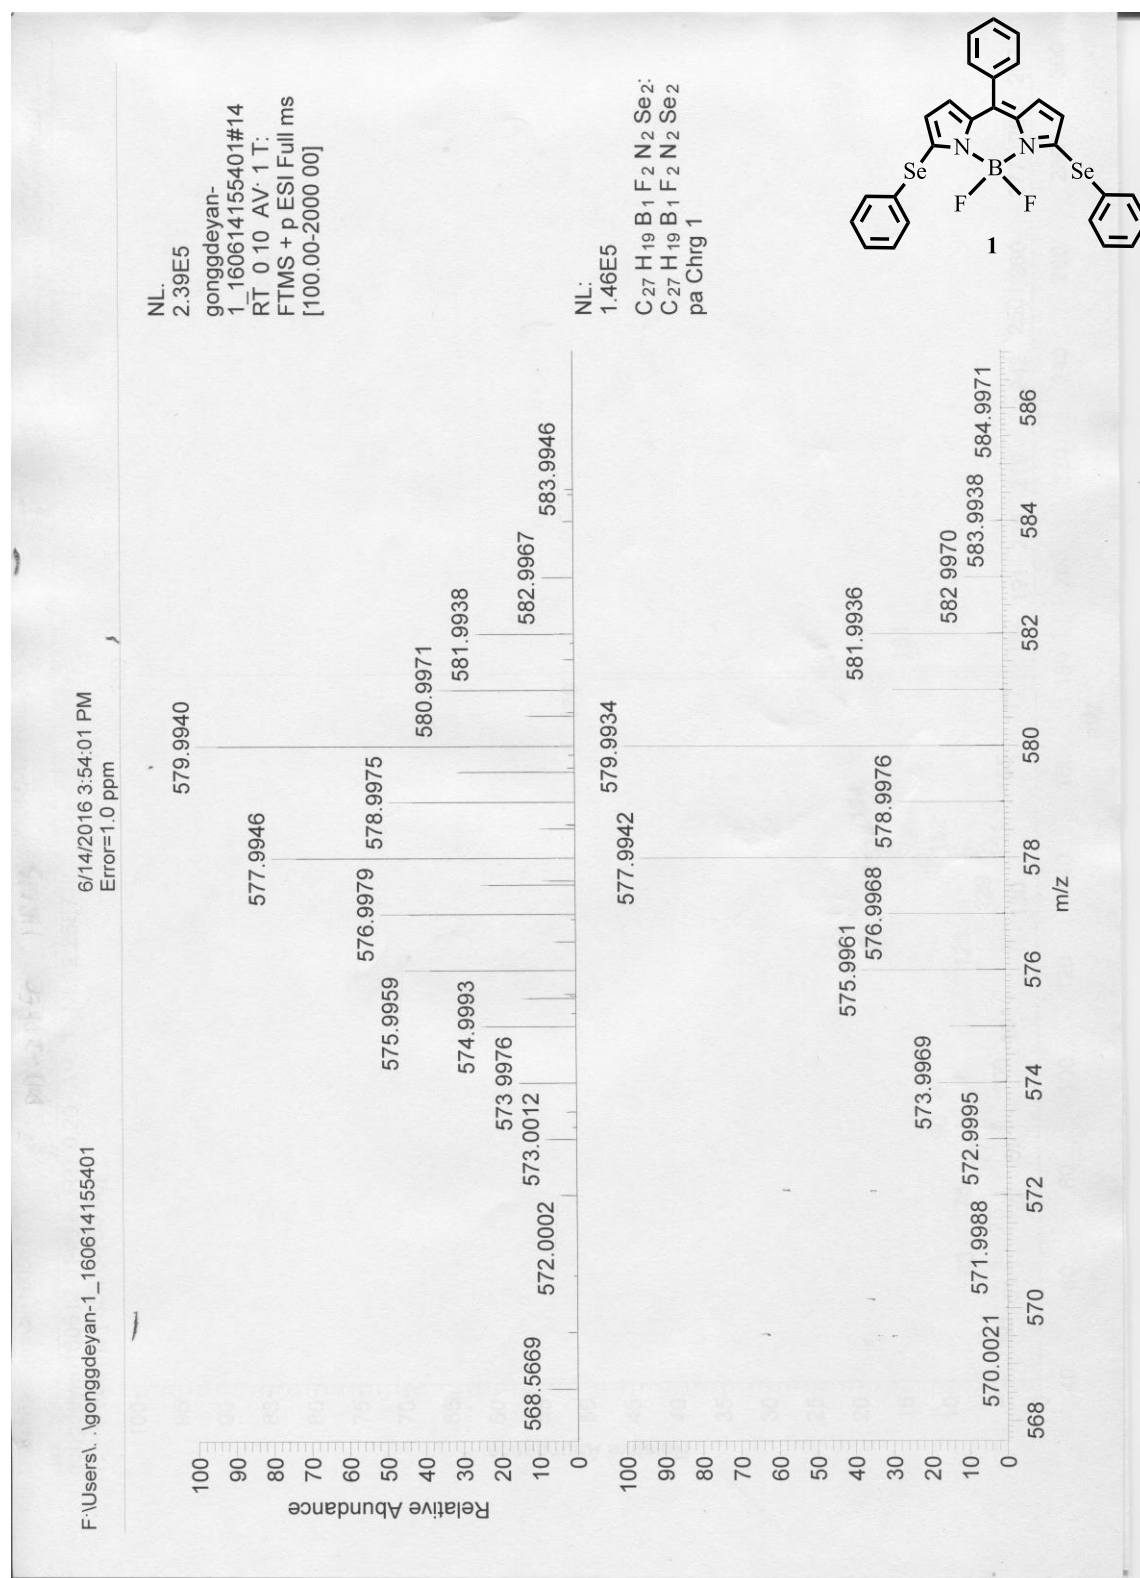

Supplement: Supplementary file 1 [file 7424149]
